# Mechanistic theory predicts the effects of temperature and humidity on inactivation of SARS-CoV-2 and other enveloped viruses

Dylan H. Morris<sup>1,2a\*</sup>, Kwe Claude Yinda<sup>3a</sup>, Amandine Gamble<sup>2a</sup>, Fernando W. Rossine<sup>1</sup>, Qishen Huang<sup>4</sup>, Trenton Bushmaker<sup>3,5</sup>, Robert J. Fischer<sup>3</sup>, M. Jeremiah Matson<sup>3,6</sup>, Neeltje van Doremalen<sup>3</sup>, Peter J. Vikesland<sup>4</sup>, Linsey C. Marr<sup>4</sup>, Vincent J. Munster<sup>3</sup>, and James O. Lloyd-Smith<sup>2\*</sup>

<sup>1</sup>*Department of Ecology & Evolutionary Biology, Princeton University, NJ, USA*

<sup>2</sup>*Department of Ecology & Evolutionary Biology, University of California, Los Angeles, CA, USA*

<sup>3</sup>*National Institute of Allergy and Infectious Diseases, Hamilton, MT, USA*

<sup>4</sup>*Department of Civil and Environmental Engineering, Virginia Tech, Blacksburg, VA, USA*

<sup>5</sup>*Department of Microbiology and Immunology, Montana State University, Bozeman, MT, USA*

<sup>6</sup>*Joan C. Edwards School of Medicine, Marshall University, Huntington, WV, USA*

<sup>a</sup>*these authors contributed equally to this work*

\**Corresponding authors. Emails: [dylan@dylanhnmorris.com](mailto:dylan@dylanhnmorris.com), [jlloydsmith@ucla.edu](mailto:jlloydsmith@ucla.edu)*

December 17, 2020

## Abstract

Environmental conditions affect virus inactivation rate and transmission potential. Understanding those effects is critical for anticipating and mitigating epidemic spread. Ambient temperature and humidity strongly affect the inactivation rate of enveloped viruses, but a mechanistic, quantitative theory of those effects has been elusive. We measure the stability of the enveloped respiratory virus SARS-CoV-2 on an inert surface at nine temperature and humidity conditions and develop a mechanistic model to explain and predict how temperature and humidity alter virus inactivation. We find SARS-CoV-2 survives longest at low temperatures and extreme relative humidities; median estimated virus half-life is over 24 hours at 10 °C and 40 % RH, but approximately 1.5 hours at 27 °C and 65 % RH. Our mechanistic model uses simple chemistry

26 to explain the increase in virus inactivation rate with increased temperature and the U-shaped  
27 dependence of inactivation rate on relative humidity. The model accurately predicts quan-  
28 titative measurements from existing studies of five different human coronaviruses (including  
29 SARS-CoV-2), suggesting that shared mechanisms may determine environmental stability for  
30 many enveloped viruses. Our results indicate scenarios of particular transmission risk, point  
31 to pandemic mitigation strategies, and open new frontiers in the mechanistic study of virus  
32 transmission.

## 33 **Introduction**

34 For viruses to transmit from one host to the next, virus particles must remain infectious in  
35 the period between release from the transmitting host and uptake by the recipient host. Virus  
36 environmental stability thus determines the potential for surface (fomite) transmission and  
37 for mid-to-long range transmission through the air. Empirical evidence suggests that virus  
38 environmental stability depends strongly on ambient temperature and humidity, particularly for  
39 enveloped viruses; examples among enveloped viruses that infect humans include influenza  
40 viruses [40], endemic human coronaviruses [25], and the zoonotic coronaviruses SARS-CoV-1  
41 [11] and MERS-CoV [59].

42 In late 2019, a new zoonotic coronavirus now called SARS-CoV-2 emerged; it has since caused  
43 a global pandemic (COVID-19), and is poised to become an endemic human pathogen. As the  
44 northern hemisphere enters winter, many countries in the temperate north have seen an increase  
45 in transmission. Epidemiologists anticipated that increase [46, 33] based on observations from  
46 other enveloped respiratory viruses, such as endemic human coronaviruses [45] and influenza  
47 viruses [39], which spread more readily in temperate winters than in temperate summers. Like  
48 the related SARS-CoV-1 virus [38], SARS-CoV-2 displays epidemic dynamics that are strongly  
49 shaped by superspreading events, in which one person transmits to many others [20, 29].

50 Virus transmission is governed by many factors, among them properties of the virus and prop-  
51 erties of the host population. But anticipating seasonal changes in transmission and preventing  
52 superspreading events both require an understanding of virus persistence in the environment, as  
53 ambient conditions can facilitate or impede virus spread.

54 Empirical evidence suggests that SARS-CoV-2, like other enveloped viruses, varies in its en-  
55 vironmental stability as a function of temperature and humidity [6, 42], but the joint effect of

56 these two factors remains unclear.

57 Moreover, despite years of research on virus environmental stability, there do not exist mecha-  
58 nistically motivated quantitative models for virus inactivation as a function of both temperature  
59 and humidity. This makes it difficult to generalize from any given experiment to unobserved  
60 conditions, or to real-world settings. Existing predictive models for the environmental stability  
61 of SARS-CoV-2 [6, 22] and other viruses [50] are phenomenological regression models that  
62 do not model the underlying biochemical mechanisms of inactivation. This limits both our  
63 insight into the underlying inactivation process and our ability to extrapolate reliably. A lack  
64 of quantitative, mechanistic models also makes it difficult to determine which environmental  
65 factors are most important, for instance whether absolute humidity [54] or relative humidity [40]  
66 best explains influenza inactivation and seasonality.

67 We measured the environmental stability of SARS-CoV-2 virus particles (virions) suspended in  
68 cell culture medium and deposited onto a polypropylene plastic surface at nine environmental  
69 conditions: three relative humidities (RH; 40 %, 65 %, and 85 %) at each of three temperatures  
70 (10 °C, 22 °C, and 27 °C). We quantified viable (infectious) virus titer over time and estimated  
71 virus decay rates and corresponding half-lives in each condition using a simple Bayesian re-  
72 gression model (see [Methods](#)). We quantified the evaporation of the suspension medium and  
73 compared virus stability during the sample evaporation phase—while substantial water loss  
74 was ongoing—to virus stability after a quasi-equilibrium phase was reached—when further  
75 evaporation was not evident over the timescale of the experiment.

76 We then created a mechanistic biochemical model of virus inactivation kinetics, drawing upon  
77 existing hypotheses for how temperature and humidity affect the inactivation chemistry of virus  
78 particles in microdroplets [40, 37]. We fit this mechanistic model to our SARS-CoV-2 data,  
79 and used it to predict observations from other human coronaviruses and other studies of SARS-  
80 CoV-2, in addition to unobserved temperature and humidity conditions.

## 81 **Empirical patterns of virus decay**

82 Our data suggest that SARS-CoV-2 environmental persistence could vary meaningfully across  
83 the range of temperatures and humidities encountered in daily life, with posterior median [95 %  
84 credible interval] half-lives as long as 27 h [20, 39] (10 °C, 40 % RH) and as short as 1.5 h [1.1,  
85 2.1] (27 °C, 65 % RH), once droplets reach quasi-equilibrium with the ambient air conditions

86 (Fig. 1b, Appendix Table A1).

87 Minimal virus decay occurred during the evaporation phase (Fig. 1a, Appendix Fig. A2), when  
88 excess water was present. Estimated half-lives were long but exact values were highly uncertain,  
89 as the small amount of absolute virus inactivation during the brief evaporation phases, combined  
90 with the noise involved in sampling and titration, limits our inferential capacity. Posterior median  
91 evaporation phase half-lives were 42 h [11, 330] at 10 °C, 12 h [4.5, 160] at 22 °C, and 5.8 h  
92 [2.1, 130] at 27 °C (Appendix Table A1).

93 Overall, virus decay became markedly faster as temperature increased for all humidities, with  
94 decay at 27 °C roughly five to ten times faster than decay at 10 °C. Across temperatures, virus  
95 decay was relatively rapid at 65 % RH and tended to be slower either at lower (40 %) or higher  
96 (85 %) humidities or when excess water was present during the evaporation phase (Fig. 1b).

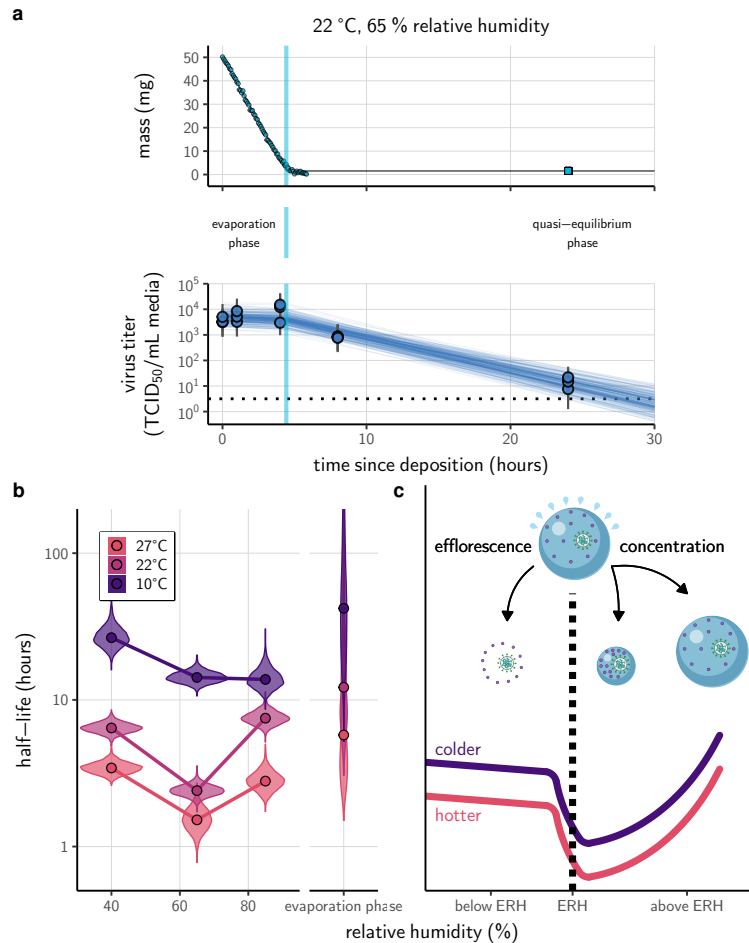

**Figure 1. Inactivation kinetics and estimated half-life of SARS-CoV-2 on an inert surface as a function of temperature and relative humidity (RH).** (a) Example of medium evaporation and virus inactivation as a function of time since deposition; experiments at 22 °C and 65 % RH shown. Inactivation proceeds in two phases: an evaporation phase during which water mass is lost from the sample to evaporation and a quasi-equilibrium phase once the sample mass has plateaued. Light blue vertical line shows posterior median estimated time that quasi-equilibrium was reached. Top plot: medium evaporation. Dots show measured masses. Square shows measured final (quasi-equilibrium) mass; plotted at 24 h for readability. Lines are 10 random draws from the posterior for the evaporation rate; horizontal section of line reflects the reaching of quasi-equilibrium (measured final mass). Bottom plot: virus inactivation. Points show posterior median estimated titers in log<sub>10</sub> TCID<sub>50</sub>/mL for each sample; lines show 95 % credible intervals. Black dotted line shows the approximate single-replicate limit of detection (LOD) of the assay: 10<sup>0.5</sup> TCID<sub>50</sub>/mL media. Three samples collected at each time-point. Lines are 10 random draws per measurement from the posterior distribution for the inactivation rates estimated by the simple regression model (see [Methods](#)). (b) Measured virus half-lives. Violin plots show posterior distribution of estimated half-lives, plotted on a logarithmic scale. Dots show posterior median value. Color indicates temperature. Measurements at 40 %, 65 %, and 85 % RH reflect decay kinetics once the deposited solution has reached quasi-equilibrium with the ambient air. Estimated half-lives for the evaporation phase that occurs prior to quasi-equilibrium are plotted to the right, since conditions during this phase are mainly dilute, and thus analogous to high RH quasi-equilibrium conditions. (c) Schematic of hypothesized effects of temperature and relative humidity on duration of virus viability. Virus half-lives are longer at lower temperatures, regardless of humidity, because inactivation reaction kinetics proceed more slowly. Relative humidity affects virus half-life by determining quasi-equilibrium solute concentration in the droplet containing the virus. Above the efflorescence relative humidity (ERH), solutes are concentrated by evaporation. The lower the ambient humidity, the more water evaporates, the more concentration occurs, and the faster inactivation reactions proceed. Below the ERH, solutes effloresce, forming crystals. Half-lives are thus not particularly sensitive to changes in sub-ERH relative humidity, and half-lives even slightly below the ERH may be substantially longer than half-lives slightly above it.

## 97 **Mechanistic model for temperature and humidity effects**

98 Many viruses, including SARS-CoV-2, exhibit exponential decay on surfaces and in aerosols  
99 [40, 15, 6]. We drew upon known principles of droplet chemistry and its potential effects on  
100 virus inactivation chemistry (Fig. 1c) to create a minimal mechanistic model incorporating the  
101 effects of both temperature and relative humidity on exponential decay rates.

102 We model temperature dependence with the Arrhenius equation, which describes a reaction rate  
103  $k$  as a function of an activation energy  $E_a$ , an asymptotic high-temperature reaction rate  $A$ , the  
104 universal gas constant  $R$ , and the absolute temperature  $T$ :

$$k = A \exp\left(-\frac{E_a}{RT}\right) \quad (1)$$

105 Prior work has found Arrhenius-like temperature dependence for virus inactivation on surfaces  
106 and in aerosols for many viruses [1], including human coronaviruses [65].

107 Mechanistic principles of virus inactivation as a function of humidity have been more elusive,  
108 but recent work has suggested that relative humidity affects virus inactivation by controlling  
109 evaporation and thus governing the solute concentrations in a droplet containing virions [40,  
110 37]. In more humid environments, evaporation is slower and more water remains when quasi-  
111 equilibrium is reached. In less humid environments, evaporation is faster and little or no water  
112 remains (Fig. 1c).

113 When released from infected hosts, virions are found in host bodily fluids, whereas viral inacti-  
114 vation experiments are typically conducted in cell culture medium containing amino-acids and  
115 electrolytes, in particular sodium chloride (NaCl) [10, 16]. Prior work has found that higher  
116 quasi-equilibrium solute concentrations are associated with faster virus inactivation rates [64,  
117 63]. The simplest explanation for this is that the measured solute concentration is a direct  
118 proxy for the concentration of the reactants governing the inactivation reaction. Thus ambient  
119 humidity affects the reaction rate by setting the quasi-equilibrium concentrations of the reactants  
120 that induce inactivation of the virus.

121 The exact quasi-equilibrium state reached will depend on the solutes present, since different  
122 solutes depress vapor pressure to different degrees. In electrolyte solutions like bodily fluids or  
123 cell culture media, efflorescence is also important. Below a threshold ambient humidity—the

124 efflorescence relative humidity (ERH)—electrolytes effloresce out of solution, forming a crystal  
125 (Fig. 1c). Below the ERH, the reaction no longer occurs in solution, and so inactivation may be  
126 slower. The notable U-shape of virus inactivation as a function of relative humidity, observed  
127 in our data (Fig. 1a) and elsewhere in the literature [63, 5, 52, 60], including for coronaviruses  
128 [9, 55], could be explained by this regime shift around the ERH (Fig. 1c).

129 To quantify these effects, we model virus inactivation at quasi-equilibrium on inert surfaces as  
130 a chemical reaction with first-order reaction kinetics; that is, the quantity of virus is the limiting  
131 reactant of the rate-determining step, and the concentrations of other reactants are assumed to be  
132 approximately constant over time. At constant temperature and humidity, the quantity of virus  
133 should then exhibit exponential decay. During the evaporation phase prior to quasi-equilibrium,  
134 reactants are less concentrated and decay is expected to be slower, as observed from our data  
135 (Fig. 1a,b). If small initial droplet sizes are used—as in real-world depositions (predominantly  
136  $< 10 \mu\text{L}$  [28, 27, 58]) and in some experiments—evaporative quasi-equilibration should be near  
137 instant, and so inactivation should follow the kinetics at quasi-equilibrium. Larger droplets, such  
138 as those used in our experiments, will take more time to equilibrate (depending on temperature  
139 and humidity), allowing us to distinguish the quasi-equilibrium phase from the evaporation  
140 phase.

141 We partition inactivation at quasi-equilibrium into two humidity regimes, effloresced and solu-  
142 tion, according to whether the ambient RH is below the ERH (effloresced) or above (solution).  
143 In either case, we approximate virus inactivation as a first-order reaction with rate  $k_{\text{eff}}$  or  $k_{\text{sol}}$ ,  
144 respectively. Based on observations of NaCl solutions at room temperature and atmospheric  
145 pressure [44], we use an ERH of 45%. This means that 40% RH experiments are in the  
146 effloresced regime and 65% and 85% RH experiments are in the solution regime.

147 We model the effloresced and solution inactivation rates  $k_{\text{eff}}$  and  $k_{\text{sol}}$  using two Arrhenius  
148 equations with a shared activation energy  $E_a$  but distinct asymptotic high-temperature reaction  
149 rates  $A_{\text{eff}}$  and  $A_{\text{sol}}$ . In solution conditions, we further modulate  $k_{\text{sol}}$  by a quasi-equilibrium  
150 “concentration factor”  $\frac{[S_{\text{eq}}]}{[S_0]}$ : how concentrated the solution has become at quasi-equilibrium  
151  $[S_{\text{eq}}]$  relative to its initial state  $[S_0]$ . Given our assumption of first-order kinetics, an n-fold  
152 increase in the non-virion reactant concentrations should translate directly into an n-fold increase

153 in the inactivation rate.

$$k_{\text{eff}} = A_{\text{eff}} \exp\left(-\frac{E_a}{RT}\right) \quad (2)$$

$$k_{\text{sol}} = \frac{[S_{\text{eq}}]}{[S_0]} A_{\text{sol}} \exp\left(-\frac{E_a}{RT}\right) \quad (3)$$

154 We estimated  $E_a$ ,  $A_{\text{eff}}$ , and  $A_{\text{sol}}$  from our data, constraining all to be positive. We treated  
155 evaporation phase data as governed by  $k_{\text{sol}}$ , with a dynamic value of the concentration factor  
156  $\frac{[S(t)]}{[S_0]}$  (Appendix section 4.4). We computed the quasi-equilibrium concentration factor  $\frac{[S_{\text{eq}}]}{[S_0]}$  in  
157 two ways: using measurements from our evaporation experiments (measured concentration fit)  
158 and with a theoretically motivated curve fit to our virological data (modeled concentration fit,  
159 Appendix Fig. A9). See Appendix section 5.5.3 for details.

160 We also considered a 4-parameter variant of the model with distinct activation energies below  
161 the ERH ( $E_a^{\text{eff}}$ ) and above ( $E_a^{\text{sol}}$ ), placing the same prior on each. This accounts for the possibility  
162 that the rate-determining step of the inactivation reaction might be distinct in the two regimes.  
163 The estimated activation energies were near-identical below and above the ERH (Fig. A8):  
164 the posterior median percentage difference between two  $E_a$  values was less than 2% (−1.2%,  
165 95% cred. int. [−24%, 17%]) for the measured concentration fit. This suggests that the  
166 rate-determining reaction step—and thus the activation energy—is the same in both regimes.  
167 Accordingly, we report estimates from the 3-parameter model with a shared  $E_a$ . We provide  
168 additional details and interpretation of our mechanistic inactivation modeling in the Appendix,  
169 sections 3, 5.5.



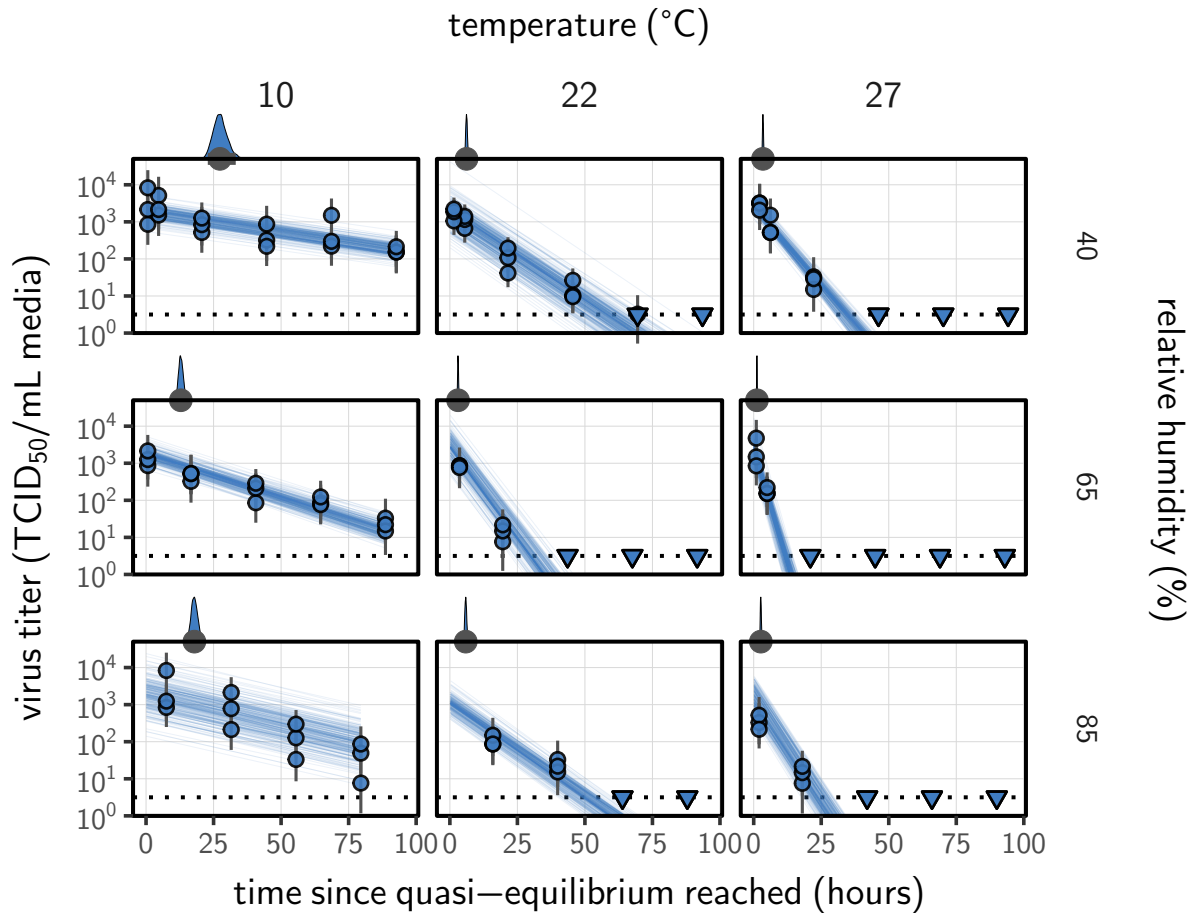

**Figure 2. Estimated titers and mechanistic model fit for SARS-CoV-2 stability on polypropylene at quasi-equilibrium.** Points show posterior median estimated titers in  $\log_{10}$  TCID<sub>50</sub>/mL for each sample; lines show 95 % credible intervals. Time-points with no positive wells for any replicate are plotted as triangles at the approximate single-replicate limit of detection (LOD) of the assay—denoted by a black dotted line at  $10^{0.5}$  TCID<sub>50</sub>/mL media—to indicate that a range of sub-LOD values are plausible. Three samples collected at each time-point. x-axis shows time since quasi-equilibrium was reached, as measured in evaporation experiments. Lines are random draws (10 per sample) from the joint posterior distribution of the initial sample virus concentration and the mechanistic model predicted decay rate; the distribution of lines gives an estimate of the uncertainty in the decay rate and the variability of the initial titer for each experiment. Density plots above each box show posterior distribution of virus half-life according to the model for the given condition; point under the density shows the posterior median half-life and line shows a 95 % credible interval. Parameters from the measured concentration model fit.

## 170 **Model fitting and prediction of unobserved conditions**

171 Our dataset comprises 9 experimental conditions, each with 7 time-points that span the evapora-  
172 tion and quasi-equilibrium phases. We sought to explain the virus inactivation rates across this  
173 entire dataset using our mechanistic model with just 3 free parameters: the activation energy  $E_a$   
174 and the asymptotic high-temperature reaction rates under effloresced and solution conditions,  
175  $A_{\text{eff}}$  and  $A_{\text{sol}}$ . The mechanistic function used and the constraint on the parameters to be positive  
176 means that inactivation rate must increase with temperature and with increasing solute concentra-  
177 tion. Remarkably, the fit of the mechanistic model (Fig. 2, Appendix Figs. A3, A4, A6) is  
178 virtually indistinguishable from the fit of the simple regression, which estimates independent  
179 exponential decay rates for each condition (Appendix Figs. A2, A5, see Appendix section 5.4.1).  
180 Parameter estimates are given in the Appendix (Fig. A10, Tables A3, A4).

181 We used the mechanistic model to predict SARS-CoV-2 half-life for unobserved temperature and  
182 humidity conditions from 0 to 40 °C, and from 0 to 100 % RH. We chose these ranges to reflect  
183 environments encountered by human beings in daily life. We did not extrapolate to temperatures  
184 below 0 °C since inactivation kinetics may be different when fluid containing the virus freezes.  
185 The exact freezing points of suspension medium and human fluids at sea level will depend on  
186 solute concentration, but will typically be below the 0 °C freezing point of pure water.

187 Median predicted SARS-CoV-2 half-life varies by more than three orders of magnitude, from less  
188 than half an hour at 40 °C just above the modeled approximate ERH, to more than a month at 0 °C  
189 and 100 % RH (Fig. 3a and c). We find good qualitative agreement between model predictions  
190 and model-free estimates from our data, including long half-lives prior to quasi-equilibrium.  
191 The U-shaped effect of humidity on virus half-life is readily explained by the regime-shift at  
192 the ERH (Fig. 3a). In particular, half-lives become extremely long at cold temperatures and in  
193 very dilute solutions, which are expected at high RH (Fig. 3a,b). Of note, the worst agreement  
194 between predictions and model-free estimates is found at 10 °C and 85 % RH (Fig. 3b). This  
195 is partially explained by the fact that the quasi-equilibrium concentration reached under those  
196 conditions was higher than our model prediction of concentration from RH (Appendix Fig. A9).  
197 Accordingly, the half-life prediction for 10 °C and 85 % RH based on measured concentration  
198 (Fig. 3b) is superior to the prediction based on modeled concentration (Fig. 3a).

199 As a stronger test of our model's validity, we used our estimated  $E_a$  and  $A$  values to make out-  
200 of-sample predictions of the half-lives of five human coronaviruses reported from independent

201 studies: four betacoronaviruses (SARS-CoV-2, SARS-CoV-1, MERS-CoV and HCoV-OC43)  
202 and one alphacoronavirus (HCoV-229E). We compiled data on the environmental stability of  
203 those viruses under conditions ranging from 4 to 95 °C, from 30 to 80 % RH, and on a range  
204 of surfaces or bulk media, and computed empirical—model-free—estimates of virus half-lives  
205 (Appendix Tables [A5– A2](#)).

206 Where both temperature and RH were available, we compared these model-free estimates to  
207 predictions based on the mechanistic model parameterized with our SARS-CoV-2 data (Fig. [3c](#),  
208 Appendix Fig. [A7](#)). We found striking agreement for half-life estimates both above and below  
209 the ERH, and for temperatures ranging from 4 to 37 °C.

210 To include a broader range of conditions in our out-of-sample model testing, we used our model  
211 to predict half-lives observed in all comparable studies by extrapolating from a reference half-life  
212 in each study. Predicted half-lives matched observations well across five orders of magnitude  
213 (Fig. [3d](#)), despite spanning five virus species and despite important heterogeneities in the data  
214 collection process (Appendix section [6](#)). The two conspicuous outliers, where SARS-CoV-2  
215 half-lives were measured to be substantially shorter than our prediction, correspond to samples  
216 exposed to high heat in closed vials [[13](#), [12](#)] which is known to accelerate virus inactivation  
217 [[21](#)].

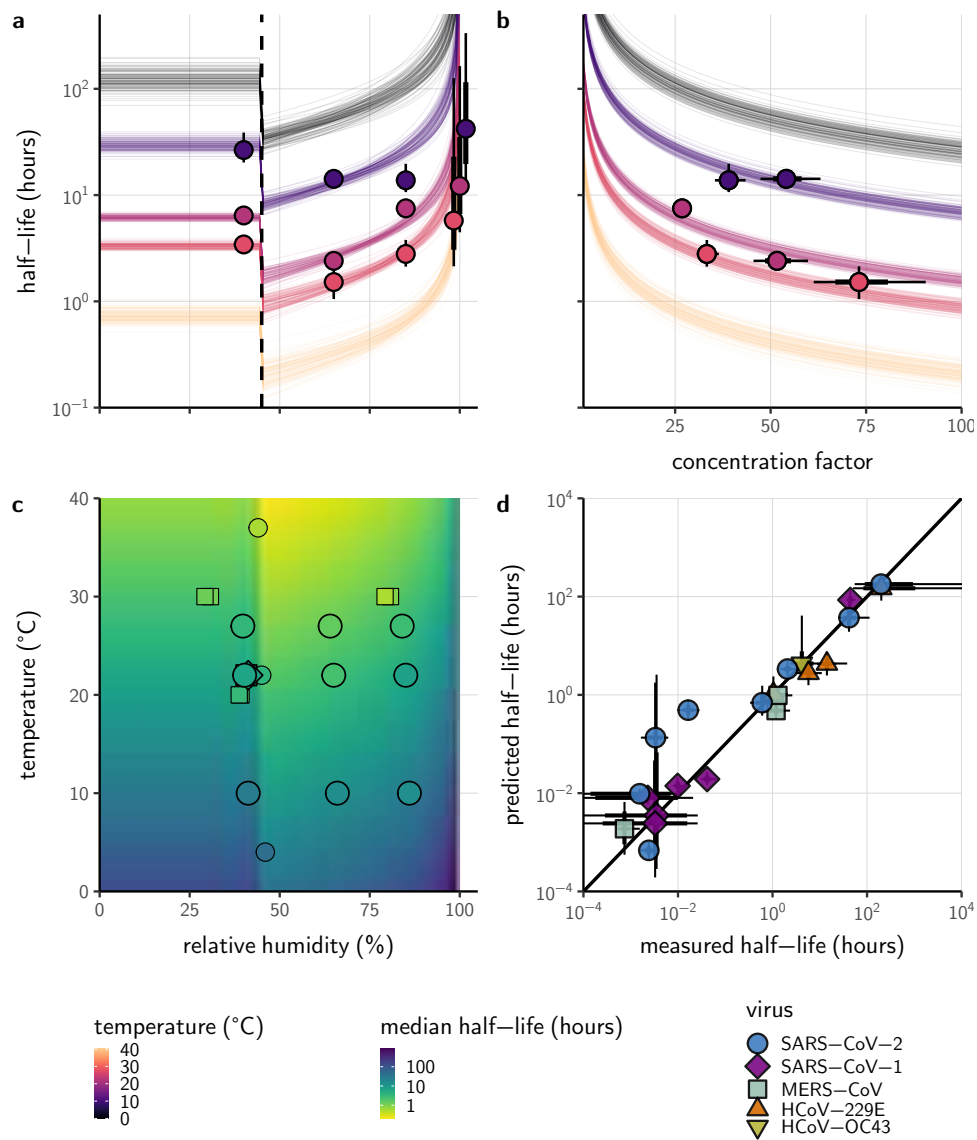

**Figure 3. Extrapolation of human coronavirus half-life from the mechanistic model to unobserved temperatures and humidities and prediction of data from the literature.** (a) Predicted half-life as a function of relative humidity, according to the modeled concentration fit. Points show posterior median for measured half-lives, estimated without the mechanistic model (i.e. independent estimation of a fixed exponential decay rate for each temperature/humidity combination), lines show a 68 % (thick) and 95 % (thin) credible interval. Dashed line shows the ERH. Estimated evaporation phase half-lives plotted at the right. Colored lines show predicted half-lives as a function of humidity at five temperatures: 0 °C, 10 °C, 22 °C, 27 °C, and 40 °C. 100 random draws from the posterior distribution are shown at each temperature to visualize uncertainty. Line and point colors indicate temperature. (b) Predicted half-life above the ERH as a function of quasi-equilibrium concentration factor, according to the measured concentration fit. Points and lines as in a, but only solution (above ERH) conditions shown. (c) Heatmap showing posterior median predicted half-lives from the modeled concentration fit as a function of temperature and relative humidity. Posterior median estimated half-lives for human coronaviruses from our study and from the literature plotted on top (see also Appendix Table A2 and Fig. A7). Shape indicates virus; measurements from our own group are shown slightly larger with a slightly thicker outline. (d) Comparison of model-free estimates (x-axis) to model predictions (y-axis) for human coronavirus half-lives. Points show posterior median for measured (horizontal) or predicted (vertical) half-lives and lines show a 68 % (thick) and 95 % (thin) credible interval. Shape indicates virus; only data from the literature are shown.

## 218 Discussion

219 Combining novel data, mathematical modeling, and a meta-analysis of existing literature, we  
220 have developed a unified, mechanistic framework to quantify the joint effects of temperature and  
221 humidity on virus stability. In particular, our model provides a mechanism for the non-linear and  
222 non-monotonic relationship between relative humidity and virus stability previously observed  
223 for numerous enveloped viruses [64, 9, 55], but not previously reported for SARS-CoV-2. Our  
224 work documents and explains the strong dependence of SARS-CoV-2 stability on environmental  
225 temperature and relative humidity, and accurately predicts half-lives for five coronavirus species  
226 in conditions from 4 to 95 °C, and from 30 to 80 % RH and in bulk solution.

227 Our findings have direct implications for the epidemiology and control of SARS-CoV-2 and  
228 other enveloped viruses. The majority of SARS-CoV-2 clusters have been linked to indoor  
229 settings [36], suggesting that virus stability in indoor environmental conditions may be an  
230 important determinant of superspreading risk. Our results provide a mechanistic explanation  
231 for the many observed SARS-CoV-2 superspreading events in cool indoor environments such as  
232 food processing plants [17, 23, 49] and hockey rinks [3, 43], where the typical air temperature is  
233 around 10 °C, or in dry indoor environments such as long-distance flights [32, 26]. Conversely,  
234 our results imply that the relative rarity of outdoor SARS-CoV-2 transmission clusters is not  
235 readily explained by temperature and humidity effects, since these conditions outdoors during  
236 temperate winters should be favorable for the virus. Instead, increased ventilation [51] and  
237 UV light inactivation [53] may be more important than the effects of temperature and humidity  
238 outdoors. In contrast, typical climate-controlled conditions indoors (moderate temperature and  
239 low humidity) are favorable for virus stability, and specialized conditions such as those found in  
240 food processing plants even more so. Our results highlight the importance of proper personal  
241 protective equipment and improved ventilation for protecting workers, particularly in cold indoor  
242 settings, and the general transmission risks associated with indoor gatherings.

243 The effects of temperature and humidity we observe in our data and model are relevant both to  
244 fomite and to airborne transmission. Prior work has shown that virus decay as a function of  
245 RH is similar in droplets on surfaces and suspended aerosols [37, 34]. Numerous studies of  
246 smaller deposited droplets [52] or aerosols [5, 63, 25] have reported similar qualitative patterns  
247 to those we report, with increased decay rates at high temperatures and a U-shaped effect of  
248 RH. Furthermore, surface stability can matter for aerosol transmission risk, since small particles  
249 containing infectious virions can be re-suspended from surfaces and inhaled [2]. Re-suspension

250 is further enhanced by procedures such as high-pressure washing, which is common in food  
251 processing plants. While the relative contributions of aerosol and fomite transmission to the  
252 epidemiology of SARS-CoV-2 continue to be investigated [47, 7], our results indicate that cold  
253 situations present elevated transmission risks for either mode, especially if air is either dry or  
254 very humid. It has been speculated, for instance, that chilled or frozen foods might allow for rare  
255 but impactful long-range fomite transmission [19]. Our results show that this is conceivable,  
256 as there is good empirical and mechanistic support for prolonged virus viability at very low  
257 temperatures.

258 Environmental stability is not the only mechanism by which temperature and humidity affect res-  
259 piratory virus transmission. Very hot or cold conditions outdoors can lead people to spend more  
260 time indoors, where transmission risks are heightened due to poor ventilation. Low-humidity  
261 environments can dry out human airways and thus impair defenses against respiratory viruses  
262 [35]. Ambient humidity also determines the size distribution of aerosols in the environment,  
263 again by affecting evaporation rates. Smaller aerosols settle to the ground more slowly [40],  
264 which could facilitate transmission.

265 At low RH, humidity effects on inactivation, immunity, and settling may compound each other:  
266 all increase transmission risk. At high RH, reduced inactivation could promote transmission, but  
267 improved immune defenses and faster settling could hinder it, so the net effect on transmission  
268 is less clear.

269 Still, temperate winters increase transmission of many respiratory viruses [39]. Individuals  
270 spend increased time indoors in heated buildings. Ventilation is often poor, as windows are kept  
271 closed to make heating efficient. Air in heated buildings is typically very dry; this improves  
272 virus stability and weakens immune defenses. Policymakers should consider ventilating and  
273 humidifying essential indoor spaces to reduce transmission risk. Other mitigation measures  
274 such as indoor masking may likewise be even more crucial during winter. Indoor spaces in  
275 which individuals cannot be masked, such as bars and restaurants, remain particular cause for  
276 concern.

277 Several analyses have projected that SARS-CoV-2 transmission will likewise be faster in tem-  
278 perate winters [46, 33, 4]. Major seasonal or climate-mediated mitigation of SARS-CoV-2  
279 spread was not evident during the northern hemisphere's spring and summer [8, 48]. This was  
280 expected, since population susceptibility and epidemic control measures can be more important

281 than seasonality in an early pandemic context [4]. Thus the fact that temperate summers did  
282 not eliminate transmission should not lead to false confidence that temperate winters will not  
283 promote it. Recent surges in cases, hospitalizations, and deaths across the northern hemisphere  
284 may have been driven in part by behavioral, immunological, or virological seasonality.

285 Our work has implications for the study of virus environmental stability and seasonality more  
286 broadly. Whether absolute or relative humidity is more important for influenza stability has  
287 been a matter of debate [54, 40]. The answer has proved elusive because it is difficult to  
288 disentangle the effects of humidity from those of temperature. Our mechanistic model permits  
289 principled dis-aggregation of those effects, and reveals a strong effect of relative humidity even  
290 after accounting for the effects of temperature.

291 There may thus exist general principles that govern virus inactivation across enveloped viruses,  
292 and perhaps even more broadly. Similar empirical patterns of temperature and humidity de-  
293 pendence to what we measured, and modeled, for SARS-CoV-2 have been observed for other  
294 important viruses. In particular, the U-shaped dependence of inactivation on RH has been  
295 reported for animal coronaviruses [55, 9], as well as for influenza viruses, paramyxoviruses,  
296 rhabdoviruses and retroviruses [63, 5, 52, 60], suggesting the existence of a shared mechanism  
297 for the effect of humidity across enveloped RNA viruses. Some enveloped DNA viruses such  
298 as herpesviruses and poxviruses [55, 60] and some encapsulated viruses such as polioviruses  
299 [14, 55] also show similar empirical behavior. Experiments have found that heat treatment of  
300 viruses reduces infectivity principally by degrading surface proteins [62], lending further sup-  
301 port to a chemical model of environmental virus inactivation. We discuss additional practical  
302 implications for the empirical study of virus environmental stability in the Appendix (section 7).

303 Despite years of research on virus stability as a function of temperature and humidity and  
304 plausible hypotheses about the underlying chemistry, proposed mechanisms have lacked ex-  
305 plicit quantitative support. By encoding the underlying chemistry into a mathematical model  
306 and estimating parameters using modern computational techniques, we provide such support,  
307 with critical insights for the control of an ongoing pandemic. Our empirical results provide  
308 mechanistic insight into transmission risks associated with cold and climate controlled indoor  
309 settings, while our modeling work allows for explicit quantitative comparison of the aerosol and  
310 fomite risks in different environments, and suggests that simple, general mechanisms govern the  
311 viability of enveloped viruses: hotter, more concentrated solutions are favorable to chemical  
312 reactions—and therefore unfavorable to viruses.

## 313 **Methods**

### 314 **Laboratory experiments**

#### 315 **Viruses and titration**

316 We used SARS-CoV-2 strain HCoV-19 nCoV-WA1-2020 (MN985325.1) [24] for this study.  
317 We quantified viable virus by end-point titration on Vero E6 cells as described previously [18,  
318 15], and inferred posterior distributions for titers and exponential decay rates directly from  
319 raw titration data using Bayesian statistical models (see [Statistical analyses and mathematical](#)  
320 [modeling](#) below).

#### 321 **Virus stability experiment**

322 We measured virus stability on polypropylene (ePlastics, reference PRONAT.030X24X47S/M)  
323 as previously described [15]. We prepared a solution of Dulbecco's Modified Eagle Medium  
324 (DMEM, a common cell culture medium) supplemented with 2 mM L-glutamine, 2% fetal  
325 bovine serum and 100 units/mL penicillin/streptomycin, and containing  $10^5$  TCID<sub>50</sub>/mL SARS-  
326 CoV-2. Polypropylene disks were autoclaved for decontamination prior to the experiment. We  
327 then placed 50  $\mu$ L aliquots of this SARS-CoV-2 suspension onto the polypropylene disks under  
328 nine environmental conditions: three RH (40 %, 65 %, and 85 %) at each of three temperatures  
329 (10 °C, 22 °C, and 27 °C). These controlled environmental conditions were produced in incubators  
330 (MMM Group CLIMACELL and Caron model 6040) with protection from UV-B or UV-C  
331 exposure. We prepared 216 disks corresponding to three replicates per eight post-deposition  
332 time-points (0, 1, 4, 8, and 24 hours, then daily for 4 days) for the nine conditions. At each  
333 time-point, samples were collected by rinsing the disks with 1 mL of DMEM and stored at  
334  $-80$  °C until titration.

#### 335 **Evaporation experiment**

336 We measured the evaporation kinetics of suspension medium under the same temperature and hu-  
337 midity conditions as the virus stability experiments. We placed 50  $\mu$ L aliquots of supplemented  
338 DMEM onto polypropylene disks in a Electro-Tech Systems 5518 environmental chamber. The  
339 polypropylene disks were rinsed three times 1M sulfuric acid, ethanol and DI H<sub>2</sub>O respec-  
340 tively before use. We measured medium mass  $m(t)$  every 5 min for up to 20 h or until a



341 quasi-equilibrium was reached using a micro-balance (Sartorius MSE3.6P-000-DM, readability  
342 0.0010 mg). The chamber of the micro-balance was half-opened to keep air circulating with the  
343 environmental chamber. The flow entering the balance chamber decreased the balance accuracy  
344 to around 0.010 mg. We measured initial droplet mass ( $m(0)$ ) and final droplet mass ( $m(\infty)$ )  
345 under closed-chamber conditions to increase accuracy.

## 346 **Statistical analyses and mathematical modeling**

347 We quantified the stability of SARS-CoV-2 under different conditions by estimating the decay  
348 rates of viable virus titers. We inferred individual titers using a Bayesian model we have  
349 previously described [21]. Briefly, the model treats titration well infection as a Poisson single-  
350 hit process. We inferred raw exponential decay rates by modifying a previously-described simple  
351 regression model [21] to account for the evaporation phase. See the Appendix (section 5.4) for  
352 model description.

353 We estimated parameters of our mechanistic models by predicting titers based on those models  
354 and then applying the same Poisson single-hit observation process to estimate parameters from  
355 the data. See the Appendix (section 5.5) for a complete description, including model priors.

356 We estimated evaporation rates and corresponding drying times by modeling mass loss for each  
357 environmental condition  $i$  as linear in time at a rate  $\beta_i$  until the final mass  $m(\infty)$  was reached,  
358 See the Appendix (sections 4.2, 5.3) for a full description including model priors.

359 We drew posterior samples using Stan [57], which implements a No-U-Turn Sampler (a form of  
360 Markov Chain Monte Carlo), via its R interface RStan [56].

## 361 **Meta-analysis**

362 To test the validity of our model beyond the measured environmental conditions (i.e., beyond 10–  
363 27 °C and 40–85 % RH), we compiled data from 11 published studies on human coronaviruses,  
364 including SARS-CoV-2, SARS-CoV-1, MERS-CoV, HCoV-OC43 and HCoV-299E, under 17  
365 temperature-RH conditions. We generated estimates of half-life and uncertainties (Appendix  
366 Table A2) and compared those estimates to the half-lives predicted by the mechanistic model  
367 parametrized from our SARS-CoV-2 data. As data on evaporation kinetics were not available,  
368 we estimated a unique half-life for each experimental condition, covering both the evaporation  
369 and quasi-equilibrium phases. As virus decay during the evaporation phase is expected to be

370 minimal, and the evaporation phase to be short, the estimated half-life can be used as a proxy  
371 for the quasi-equilibrium half-life. The complete data selection, extraction and analysis process  
372 is detailed in the Appendix (section 6).

373 We also included data from SARS-CoV-1 and MERS-CoV collected by our group during  
374 previous studies [15]. Those data were collected at 22 °C and 40 % RH on polypropylene using  
375 the protocol described previously [15] and similar to the one used to collect the SARS-CoV-2  
376 data. SARS-CoV-1 strain Tor2 (AY274119.3) [41] and MERS-CoV strain HCoV-EMC/2012  
377 [66] were used for these experiments. We calculated half-lives for evaporation and quasi-  
378 equilibrium phases using the same analysis pipeline used for SARS-CoV-2 (Appendix section  
379 5.4). These data were used only for out-of-sample prediction testing. We used the obtained  
380 evaporation phase half-lives as proxies for the half-life at 100 % RH, as with SARS-CoV-2.  
381 See Appendix section 6.3 for a figure showing model fits (Fig. A32) and a table of estimated  
382 half-lives (Table A5).

## 383 Visualization

384 We created plots in R version using `ggplot2` [61], `ggdist` [30], and `tidybayes` [31], and  
385 created original schematics using [BioRender.com](https://www.biorender.com).

## 386 References

- 387 [1] Mark H Adams. “The stability of bacterial viruses in solutions of salts”. In: *The Journal*  
388 *of general physiology* 32.5 (1949), p. 579.
- 389 [2] Sima Asadi et al. “Influenza A Virus Is Transmissible via Aerosolized Fomites”. In: *Nature*  
390 *Communications* 11 (Aug. 18, 2020), p. 4062. ISSN: 2041-1723. DOI: [10.1038/s41467-020-17888-w](https://doi.org/10.1038/s41467-020-17888-w).
- 391 [3] David Atrubin, Michael Wiese, and Becky Bohinc. “An Outbreak of COVID-19 Associ-  
392 ated with a Recreational Hockey Game-Florida, June 2020”. In: *Morbidity and Mortality*  
393 *Weekly Report* 69.41 (2020), p. 1492.
- 394 [4] Rachel E. Baker et al. “Susceptible supply limits the role of climate in the early SARS-  
395 CoV-2 pandemic”. In: *Science* (2020). DOI: [10.1126/science.abc2535](https://doi.org/10.1126/science.abc2535).
- 396 [5] J. E. Benbough. “Some factors affecting the survival of airborne viruses”. In: *The Journal*  
397 *of General Virology* 10 (1971), pp. 209–220. DOI: [10.1099/0022-1317-10-3-209](https://doi.org/10.1099/0022-1317-10-3-209).
- 398

- 399 [6] Jennifer Biryukov et al. “Increasing Temperature and Relative Humidity Accelerates  
400 Inactivation of SARS-CoV-2 on Surfaces”. In: *Mosphere* 5.4 (2020).
- 401 [7] Jing Cai et al. “Indirect Virus Transmission in Cluster of COVID-19 Cases, Wenzhou,  
402 China, 2020”. In: *Emerging Infectious Diseases* 26 (2020). DOI: [10.3201/eid2606.  
403 200412](https://doi.org/10.3201/eid2606.200412).
- 404 [8] Colin J Carlson et al. “Misconceptions about weather and seasonality must not misguide  
405 COVID-19 response”. In: *Nature Communications* 11.1 (2020), pp. 1–4.
- 406 [9] Lisa M Casanova et al. “Effects of air temperature and relative humidity on coronavirus  
407 survival on surfaces”. In: *Applied and environmental microbiology* 76.9 (2010), pp. 2712–  
408 2717. DOI: [10.1128/AEM.02291-09](https://doi.org/10.1128/AEM.02291-09).
- 409 [10] Franco Cavaliere et al. “Airway secretion electrolytes: reflection of water and salt states  
410 of the body.” In: *Critical care medicine* 17.9 (1989), pp. 891–894.
- 411 [11] Kwok-Hung Chan et al. “The effects of temperature and relative humidity on the viability  
412 of the SARS coronavirus”. In: *Advances in Virology* 2011 (2011). DOI: [10.1155/2011/  
413 734690](https://doi.org/10.1155/2011/734690).
- 414 [12] Alex W. H. Chin. personal communication. Aug. 5, 2020.
- 415 [13] Alex W. H. Chin et al. “Stability of SARS-CoV-2 in different environmental conditions”.  
416 In: *The Lancet Microbe* 1 (2020), e10. DOI: [10.1016/S2666-5247\(20\)30003-3](https://doi.org/10.1016/S2666-5247(20)30003-3).
- 417 [14] JC De Jong and KC Winkler. “The inactivation of poliovirus in aerosols”. In: *Epidemiol-  
418 ogy & Infection* 66.4 (1968), pp. 557–565.
- 419 [15] Neeltje van Doremalen et al. “Aerosol and surface stability of SARS-CoV-2 as compared  
420 with SARS-CoV-1”. In: *New England Journal of Medicine* 382 (2020), pp. 1564–1567.  
421 DOI: [10.1056/NEJMc2004973](https://doi.org/10.1056/NEJMc2004973).
- 422 [16] R Dulbecco and G Freeman. “Plaque production by the polyoma virus.” In: *Virology* 8.3  
423 (1959), p. 396.
- 424 [17] Jonathan W. Dyal. “COVID-19 Among Workers in Meat and Poultry Processing Facilities  
425 — 19 States, April 2020”. In: *Morbidity and Mortality Weekly Report* 69 (2020). DOI:  
426 [10.15585/mmwr.mm6918e3](https://doi.org/10.15585/mmwr.mm6918e3).
- 427 [18] Robert Fischer et al. “Assessment of N95 respirator decontamination and re-use for  
428 SARS-CoV-2”. In: *Emerging Infectious Diseases* In press (2020). DOI: [10.1101/2020.  
429 04.11.20062018](https://doi.org/10.1101/2020.04.11.20062018).
- 430 [19] Dale Fisher et al. “Seeding of outbreaks of COVID-19 by contaminated fresh and frozen  
431 food”. In: *bioRxiv* (2020).

- 432 [20] Yuki Furuse et al. “Clusters of coronavirus disease in communities, Japan, January–April  
433 2020”. In: *Emerging infectious diseases* 26.9 (2020), p. 2176.
- 434 [21] Amandine Gamble et al. “Heat-treated virus inactivation rate depends strongly on treat-  
435 ment procedure”. In: *bioRxiv* (2020). DOI: [10.1101/2020.08.10.242206](https://doi.org/10.1101/2020.08.10.242206).
- 436 [22] Laurent Guillier et al. “Modeling the inactivation of viruses from the coronaviridae family  
437 in response to temperature and relative humidity in suspensions or on surfaces”. In:  
438 *Applied and Environmental Microbiology* 86.18 (2020). DOI: [10.1128/AEM.01244-20](https://doi.org/10.1128/AEM.01244-20).
- 439 [23] Thomas Günther et al. “Investigation of a superspreading event preceding the largest meat  
440 processing plant-related SARS-Coronavirus 2 outbreak in Germany”. In: *SSRN* (2020).  
441 DOI: [10.2139/ssrn.3654517](https://doi.org/10.2139/ssrn.3654517).
- 442 [24] Michelle L. Holshue et al. “First Case of 2019 Novel Coronavirus in the United States”.  
443 In: *New England Journal of Medicine* 382.10 (2020), pp. 929–936. DOI: [10.1056/  
444 NEJMoa2001191](https://doi.org/10.1056/NEJMoa2001191).
- 445 [25] M. K. Ijaz et al. “Survival Characteristics of Airborne Human Coronavirus 229E”. In: *The  
446 Journal of General Virology* 66 (Pt 12) (Dec. 1985), pp. 2743–2748. ISSN: 0022-1317.  
447 DOI: [10.1099/0022-1317-66-12-2743](https://doi.org/10.1099/0022-1317-66-12-2743).
- 448 [26] Mahesh Jayaweera et al. “Transmission of COVID-19 virus by droplets and aerosols:  
449 A critical review on the unresolved dichotomy”. In: *Environmental Research* (2020),  
450 p. 109819.
- 451 [27] David Johnson et al. “Aerosol Generation by Modern Flush Toilets”. In: *Aerosol Science  
452 and Technology* 47 (Sept. 1, 2013), pp. 1047–1057. ISSN: 0278-6826. DOI: [10.1080/  
453 02786826.2013.814911](https://doi.org/10.1080/02786826.2013.814911).
- 454 [28] G.R. Johnson et al. “Modality of Human Expired Aerosol Size Distributions”. In: *Journal  
455 of Aerosol Science* 42 (Dec. 2011), pp. 839–851. ISSN: 00218502. DOI: [10.1016/j.  
456 jaerosci.2011.07.009](https://doi.org/10.1016/j.jaerosci.2011.07.009).
- 457 [29] Morgan P Kain et al. “Chopping the tail: how preventing superspreading can help to  
458 maintain COVID-19 control”. In: *MedRxiv* (2020).
- 459 [30] Matthew Kay. *ggdist: Visualizations of Distributions and Uncertainty*. R package version  
460 2.2.0. 2020. DOI: [10.5281/zenodo.3879620](https://doi.org/10.5281/zenodo.3879620). URL: [http://mjskay.github.io/  
461 ggdist/](http://mjskay.github.io/ggdist/).
- 462 [31] Matthew Kay. *tidybayes: Tidy Data and Geoms for Bayesian Models*. R package version  
463 2.1.1. 2020. DOI: [10.5281/zenodo.1308151](https://doi.org/10.5281/zenodo.1308151). URL: [http://mjskay.github.io/  
464 tidybayes/](http://mjskay.github.io/tidybayes/).

- 465 [32] Nguyen Cong Khanh et al. “Transmission of Severe Acute Respiratory Syndrome Coro-  
466 navirus 2 During Long Flight”. In: *Emerging Infectious Diseases* (2020). DOI: [10.3201/  
467 eid2611.203299](https://doi.org/10.3201/eid2611.203299).
- 468 [33] Stephen M. Kissler et al. “Projecting the transmission dynamics of SARS-CoV-2 through  
469 the postpandemic period”. In: *Science* (2020). ISSN: 0036-8075, 1095-9203. DOI: [10.  
470 1126/science.abb5793](https://doi.org/10.1126/science.abb5793). URL: [https://science.sciencemag.org/content/  
471 early/2020/04/14/science.abb5793](https://science.sciencemag.org/content/early/2020/04/14/science.abb5793).
- 472 [34] Karen A Kormuth et al. “Influenza virus infectivity is retained in aerosols and droplets  
473 independent of relative humidity”. In: *The Journal of infectious diseases* 218.5 (2018),  
474 pp. 739–747.
- 475 [35] Eriko Kudo et al. “Low ambient humidity impairs barrier function and innate resistance  
476 against influenza infection”. In: *Proceedings of the National Academy of Sciences* 116.22  
477 (2019), pp. 10905–10910.
- 478 [36] Quentin J. Leclerc et al. “What Settings Have Been Linked to SARS-CoV-2 Transmission  
479 Clusters?” In: *Wellcome Open Research* 5 (June 5, 2020), p. 83. ISSN: 2398-502X. DOI:  
480 [10.12688/wellcomeopenres.15889.2](https://doi.org/10.12688/wellcomeopenres.15889.2).
- 481 [37] Kaisen Lin and Linsey C Marr. “Humidity-dependent decay of viruses, but not bacteria,  
482 in aerosols and droplets follows disinfection kinetics”. In: *Environmental Science &  
483 Technology* 54.2 (2020), pp. 1024–1032. DOI: [10.1021/acs.est.9b04959](https://doi.org/10.1021/acs.est.9b04959).
- 484 [38] James O Lloyd-Smith et al. “Superspreading and the effect of individual variation on  
485 disease emergence”. In: *Nature* 438.7066 (2005), pp. 355–359.
- 486 [39] Eric Lofgren et al. “Influenza Seasonality: Underlying Causes and Modeling Theories”.  
487 In: *Journal of Virology* 81.11 (2007), pp. 5429–5436. ISSN: 0022-538X, 1098-5514. DOI:  
488 [10.1128/JVI.01680-06](https://doi.org/10.1128/JVI.01680-06).
- 489 [40] Linsey C Marr et al. “Mechanistic insights into the effect of humidity on airborne influenza  
490 virus survival, transmission and incidence”. In: *Journal of the Royal Society Interface*  
491 16.150 (2019), p. 20180298.
- 492 [41] Marco A Marra et al. “The genome sequence of the SARS-associated coronavirus”. In:  
493 *Science* 300.5624 (2003), pp. 1399–1404.
- 494 [42] M. Jeremiah Matson et al. “Effect of Environmental Conditions on SARS-CoV-2 Stability  
495 in Human Nasal Mucus and Sputum”. In: *Emerging Infectious Diseases* 26 (2020), in  
496 press. DOI: [10.3201/eid2609.202267](https://doi.org/10.3201/eid2609.202267).

- 497 [43] Nakia McNabb and Brian Ries. “Vermont coronavirus cluster traced to hockey teams and  
498 a broomball league”. In: *CNN* (Oct. 2020). URL: [https://www.cnn.com/2020/10/](https://www.cnn.com/2020/10/20/us/vermont-ice-rink-covid-trnd/index.html)  
499 [20/us/vermont-ice-rink-covid-trnd/index.html](https://www.cnn.com/2020/10/20/us/vermont-ice-rink-covid-trnd/index.html).
- 500 [44] E Mikhailov et al. “Interaction of aerosol particles composed of protein and salt with  
501 water vapor: hygroscopic growth and microstructural rearrangement”. In: (2004).
- 502 [45] Arnold S Monto et al. “Coronavirus occurrence and transmission over 8 years in the  
503 HIVE cohort of households in Michigan”. In: *The Journal of infectious diseases* 222.1  
504 (Apr. 2020), pp. 9–16. DOI: [10.1093/infdis/jiaa161](https://doi.org/10.1093/infdis/jiaa161).
- 505 [46] Richard A Neher et al. “Potential impact of seasonal forcing on a SARS-CoV-2 pandemic”.  
506 In: *Swiss medical weekly* 150.1112 (2020).
- 507 [47] Sean Wei Xiang Ong et al. “Air, Surface Environmental, and Personal Protective Equip-  
508 ment Contamination by Severe Acute Respiratory Syndrome Coronavirus 2 (SARS-CoV-  
509 2) From a Symptomatic Patient”. In: *JAMA* (Mar. 4, 2020). DOI: [10.1001/jama.2020.](https://doi.org/10.1001/jama.2020.3227)  
510 [3227](https://doi.org/10.1001/jama.2020.3227).
- 511 [48] Canelle Poirier et al. “The Role of Environmental Factors on Transmission Rates of the  
512 COVID-19 Outbreak: An Initial Assessment in Two Spatial Scales”. en. In: *Scientific*  
513 *Reports* 10.1 (Oct. 2020), p. 17002. ISSN: 2045-2322. DOI: [10.1038/s41598-020-](https://doi.org/10.1038/s41598-020-74089-7)  
514 [74089-7](https://doi.org/10.1038/s41598-020-74089-7).
- 515 [49] Roman Pokora et al. “Investigation of superspreading COVID-19 outbreaks events in meat  
516 and poultry processing plants in Germany: A cross-sectional study”. In: *arXiv preprint*  
517 (2020). URL: <https://arxiv.org/abs/2011.11153>.
- 518 [50] JA Posada, J Redrow, and I Celik. “A mathematical model for predicting the viability of  
519 airborne viruses”. In: *Journal of virological methods* 164.1-2 (2010), pp. 88–95.
- 520 [51] Kimberly A Prather, Chia C Wang, and Robert T Schooley. “Reducing transmission of  
521 SARS-CoV-2”. In: *Science* (2020).
- 522 [52] Aaron J Prussin et al. “Survival of the enveloped virus Phi6 in droplets as a function of  
523 relative humidity, absolute humidity, and temperature”. In: *Applied and environmental*  
524 *microbiology* 84.12 (2018). DOI: [10.1128/AEM.00551-18](https://doi.org/10.1128/AEM.00551-18).
- 525 [53] Shanna Ratnesar-Shumate et al. “Simulated sunlight rapidly inactivates SARS-CoV-2 on  
526 surfaces”. In: *The Journal of Infectious Diseases* (2020).
- 527 [54] Jeffrey Shaman et al. “Absolute Humidity and the Seasonal Onset of Influenza in the  
528 Continental United States”. In: *PLoS Biology* 8.2 (2010), e1000316. ISSN: 1545-7885.  
529 DOI: [10.1371/journal.pbio.1000316](https://doi.org/10.1371/journal.pbio.1000316).

- 530 [55] Joseph R Songer. “Influence of relative humidity on the survival of some airborne viruses”.  
531 In: *Applied microbiology* 15.1 (1967), pp. 35–42.
- 532 [56] Stan Development Team. “RStan: the R interface to Stan”. In: *R package version 2.1*  
533 (2016).
- 534 [57] Stan Development Team. *The Stan Core Library*. Version 2.18.0. 2018. URL: <https://mc-stan.org/>.  
535
- 536 [58] Katy-Anne Thompson et al. “Influenza Aerosols in UK Hospitals during the H1N1 (2009)  
537 Pandemic – The Risk of Aerosol Generation during Medical Procedures”. In: *PLOS ONE*  
538 8 (Feb. 13, 2013), e56278. ISSN: 1932-6203. DOI: [10.1371/journal.pone.0056278](https://doi.org/10.1371/journal.pone.0056278).
- 539 [59] N Van Doremalen, T Bushmaker, and VJ Munster. “Stability of Middle East Respiratory  
540 Syndrome coronavirus (MERS-CoV) under different environmental conditions”. In: *Eu-*  
541 *rosurveillance* 18.38 (2013), p. 20590. DOI: [10.2807/1560-7917.ES2013.18.38.20590](https://doi.org/10.2807/1560-7917.ES2013.18.38.20590).  
542
- 543 [60] SJ Webb, R Bather, and RW Hodges. “The effect of relative humidity and inositol on  
544 air-borne viruses”. In: *Canadian Journal of Microbiology* 9.1 (1963), pp. 87–92.
- 545 [61] Hadley Wickham. *ggplot2: Elegant Graphics for Data Analysis*. Springer-Verlag New  
546 York, 2016. ISBN: 978-3-319-24277-4. URL: <https://ggplot2.tidyverse.org>.
- 547 [62] Krista Rule Wigginton et al. “Virus inactivation mechanisms: impact of disinfectants  
548 on virus function and structural integrity”. In: *Environmental Science & Technology* 46  
549 (2012), pp. 12069–12078. ISSN: 1520-5851. DOI: [10.1021/es3029473](https://doi.org/10.1021/es3029473).
- 550 [63] Wan Yang, Subbiah Elankumaran, and Linsey C Marr. “Relationship between Humidity  
551 and Influenza A Viability in Droplets and Implications for Influenza’s Seasonality”. In:  
552 *PloS ONE* 7 (2012). DOI: [10.1371/journal.pone.0046789](https://doi.org/10.1371/journal.pone.0046789).
- 553 [64] Wan Yang and Linsey C Marr. “Mechanisms by Which Ambient Humidity May Af-  
554 fect Viruses in Aerosols”. In: *Applied and Environmental Microbiology* 78.19 (2012),  
555 pp. 6781–6788. DOI: [10.1128/AEM.01658-12](https://doi.org/10.1128/AEM.01658-12).
- 556 [65] Te Faye Yap et al. “A Predictive Model of the Temperature-Dependent Inactivation of  
557 Coronaviruses”. In: (2020). DOI: [10.26434/chemrxiv.12152970.v4](https://doi.org/10.26434/chemrxiv.12152970.v4).
- 558 [66] Ali M Zaki et al. “Isolation of a novel coronavirus from a man with pneumonia in Saudi  
559 Arabia”. In: *New England Journal of Medicine* 367.19 (2012), pp. 1814–1820.

## 560 **Acknowledgments**

561 This research was supported by the Intramural Research Program of the National Institute of  
562 Allergy and Infectious Diseases (NIAID), National Institutes of Health (NIH). DHM was sup-  
563 ported by the U.S. National Science Foundation (CCF 1917819). JOL-S and AG were supported  
564 by the Defense Advanced Research Projects Agency DARPA PREEMPT #D18AC00031 and the  
565 UCLA AIDS Institute and Charity Treks, and JOL-S was supported by the U.S. National Science  
566 Foundation (DEB-1557022), the Strategic Environmental Research and Development Program  
567 (SERDP, RC-2635) of the U.S. QH, LCM, and PJV were supported by the U.S. National Science  
568 Foundation (CBET-1705653, CBET-2029911). The content of the article does not necessarily  
569 reflect the position or the policy of the U.S. government, and no official endorsement should be  
570 inferred.

## 571 **Author contributions**

572 VJM and JOL-S conceived the study. KCY performed the inactivation experiments, with  
573 support from TB, RJF, MJM, NvD, and VJM. QH performed the evaporation experiments, with  
574 support from PJV and LCM. DHM developed the mechanistic model and conducted statistical  
575 and theoretical analysis, with support from JOL-S, AG, FWR, and LCM. DHM wrote analysis  
576 code and produced figures and schematics. AG reviewed the literature on coronavirus stability  
577 and compiled and prepared data for meta-analysis. DHM, AG, and JOL-S drafted the paper,  
578 which all authors edited.

## 579 **Declaration of interests**

580 We have no competing interests to declare.

## 581 **Code and data availability**

582 All code and data needed to reproduce results and figures is archived on Github (<https://github.com/dylanhnmorris/sars-cov-2-temp-humidity/>) and on Zenodo (<https://doi.org/10.5281/zenodo.4093264>), and licensed for reuse, with appropriate attribu-  
584 tion/citation, under a BSD 3-Clause Revised License.  
585
